# Supplementary material
Source: Frontiers journal article supplement (https://www.frontiersin.org/articles/319611)
Supplement: Table_1.PDF [file Table_1.PDF]

**Supplementary Table 1:** ATC codes used in the study

| Medication group                                                                                                                                                                                                              | ATC codes                                                                                                                                                                                                                                                                                                                                                     |
|-------------------------------------------------------------------------------------------------------------------------------------------------------------------------------------------------------------------------------|---------------------------------------------------------------------------------------------------------------------------------------------------------------------------------------------------------------------------------------------------------------------------------------------------------------------------------------------------------------|
| <u>Antiparasitic products</u><br>Antiparasitic products, insecticides and repellents                                                                                                                                          | P01AB01, P01BA02, P01BB51, P01BC01, P01BC02, P02CA01, P02CX01                                                                                                                                                                                                                                                                                                 |
| <u>Statins all</u><br>Lipid modifying agents                                                                                                                                                                                  | C10AA01, C10AA02, C10AA03, C10AA05, C10AA07, C10AC01, C10AD52, C10AX09, C10BA02                                                                                                                                                                                                                                                                               |
| <u>Statins fermented</u><br>Lipid modifying agents                                                                                                                                                                            | C10BA02, C10AA01, C10AA02, C10AA03                                                                                                                                                                                                                                                                                                                            |
| <u>Statins synthetic</u><br>Lipid modifying agents                                                                                                                                                                            | C10AA05, C10AA07                                                                                                                                                                                                                                                                                                                                              |
| <u>Biologics</u><br>Antineoplastic and immunomodulating agents                                                                                                                                                                | L01AA02, L01AB01, L01AX03, L01BA01, L01BC06, L01XX05, L04AA06, L04AA13, L04AB01, L04AB04, L04AB06, L04AD01, L04AD02, L04AX01, L04AX03                                                                                                                                                                                                                         |
| <u>Nonsteroidal antiinflammatory drugs (NSAID)</u><br>Antiinflammatory and antirheumatic products, non-steroids<br><br>Antiinflammatory agents, non-steroids                                                                  | M01AB01, M01AB02, M01AB05, M01AB15, M01AB55, M01AC01, M01AC02, M01AE01, M01AE02, M01AE03, M01AE51, M01AH01, M01AH02, M01AH03, M01AH05, M01AX01, M01AX05, M01AX25, S01BC03, S01BC10                                                                                                                                                                            |
| <u>Asthma and Allergy medication</u><br><br>Decongestants and other nasal preparations for topical use<br>Drugs for obstructive airway diseases<br>Antihistamines for systemic use<br>Corticosteroids for systemic use, plain | R01AC01, R01AC02, R01AD01, R01AD05, R01AD08, R01AD09, R01AD11, R01AD12, R03BA02, R03BA05, R03BA07, R03AK06, R03AK07, R03AK10, R03AC02, R03AC03, R03AC12, R03AC13, R06AA02, R06AA04, R06AA52, R06AB02, R06AD01, R06AD02, R06AD03, R06AE05, R06AE07, R06AX13, R06AX22, R06AX26, R06AX27, H02AA02, H02AB01, H02AB02, H02AB04, H02AB06, H02AB07, H02AB08, H02AB09 |
| <u>Inhaled corticosteroids (ICS)</u><br><br>Decongestants and other nasal preparations for topical use<br>Drugs for obstructive airway diseases                                                                               | R01AD, R03BA, R03AK                                                                                                                                                                                                                                                                                                                                           |
